# Supplementary material for: Lipidomics reveals altered biosynthetic pathways of glycerophospholipids and cell signaling as biomarkers of the polycystic ovary syndrome
Source: PubMed Central journal article supplement (PMC5796992; doi:10.18632/oncotarget.23393), 2017-12-17
Supplement: oncotarget-09-4522-s001.pdf [file oncotarget-09-4522-s001.pdf]

## Lipidomics reveals altered biosynthetic pathways of glycerophospholipids and cell signaling as biomarkers of the polycystic ovary syndrome

### SUPPLEMENTARY MATERIALS

**Supplementary Table 1: Class representative and extraction internal standards added to the samples**

| Compound                                                                                    | Reference                    |
|---------------------------------------------------------------------------------------------|------------------------------|
| 1,3(d5)-dihexadecanoyl-glycerol                                                             | 110537, Avanti Polar Lipids  |
| 1,3(d5)-dihexadecanoyl-2-octadecanoyl-glycerol                                              | 110543, Avanti Polar Lipids  |
| 1-hexadecanoyl(d31)-2-(9Z-octadecenoyl)-sn-glycero-3-phosphate                              | 110920, Avanti Polar Lipids  |
| 1-hexadecanoyl(d31)-2-(9Z-octadecenoyl)-sn-glycero-3-phosphocholine                         | 110918, Avanti Polar Lipids  |
| 1-hexadecanoyl(d31)-2-(9Z-octadecenoyl)-sn-glycero-3-phosphoethanolamine                    | 110921, Avanti Polar Lipids  |
| 1-hexadecanoyl-2-(9Z-octadecenoyl)-sn-glycero-3-phospho-(1'-rac-glycerol-1',1',2',3',3'-d5) | 110899, Avanti Polar Lipids  |
| 1-hexadecanoyl(d31)-2-(9Z-octadecenoyl)-sn-glycero-3-phospho-myoinositol                    | 110923, Avanti Polar Lipids  |
| 1-hexadecanoyl(d31)-2-(9Z-octadecenoyl)-sn-glycero-3-[phospho-L-serine]                     | 110922, Avanti Polar Lipids  |
| 26:0-d4 Lyso PC                                                                             | 860389, Avanti Polar Lipids  |
| 18:1 Chol (D7) ester                                                                        | 111015, Avanti Polar Lipids  |
| cholest-5-en-3 $\beta$ -ol(d7)                                                              | LM-4100, Avanti Polar Lipids |
| D-erythro-sphingosine-d7                                                                    | 860657, Avanti Polar Lipids  |
| D-erythro-sphingosine-d7-1-phosphate                                                        | 860659, Avanti Polar Lipids  |
| N-palmitoyl-d31-D-erythro-sphingosine                                                       | 868516, Avanti Polar Lipids  |
| N-palmitoyl-d31-D-erythro-sphingosylphosphorylcholine                                       | 868584, Avanti Polar Lipids  |
| Octadecanoic acid-2,2-d2                                                                    | 19905-58-9, Sigma Aldrich    |

**Supplementary Table 2: Pearson correlation analyses between specific lipid species and total testosterone plasma levels of subjects.** See Supplementary\_Table\_2

**Supplementary Table 3: Lipid species with an area under the curve higher than 0.8 in receiver operator characteristic (ROC).** See Supplementary\_Table\_3
